# Supplementary material for: Monitoring of cell layer coverage and differentiation with the organic electrochemical transistor
Source: Royal Society of Chemistry journal article supplement (doi:10.1039/c5tb00922g), 2015-01-01
Supplement: c5tb00922g1.pdf [file c5tb00922g1.pdf]

## Supporting Information

### Monitoring of cell layer coverage and differentiation with the organic electrochemical transistor

M. Ramuz,<sup>a</sup> A. Hama,<sup>a</sup> J. Rivnay,<sup>a</sup> P. Leleux, and R. M. Owens<sup>a</sup>

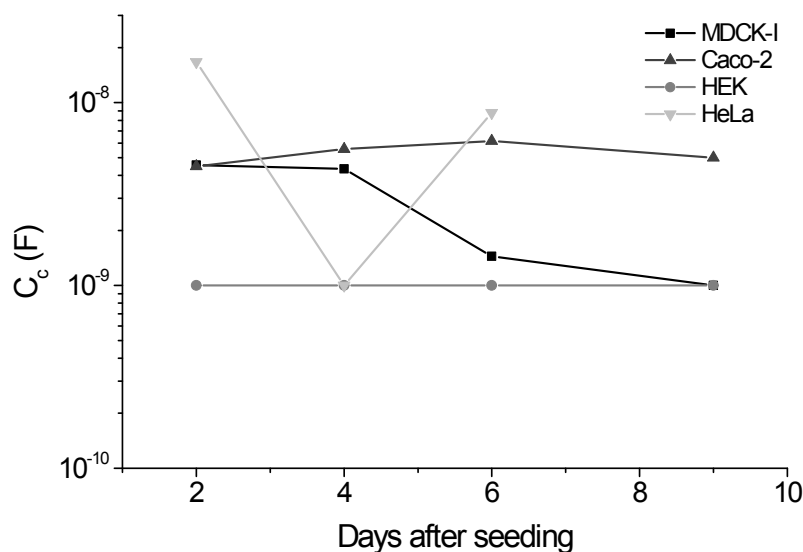

**Figure S1:** Cell layer capacitance extracted from the fit of Figure 2. Note that values of  $C_{\text{OECT}} = 1.5 \times 10^{-8} \text{ F}$  ( $\pm 0.1 \times 10^{-8} \text{ F}$ ); and  $R_s = 8 \times 10^3 \Omega$  ( $\pm 1 \times 10^3 \Omega$ ) were fixed for the fit.

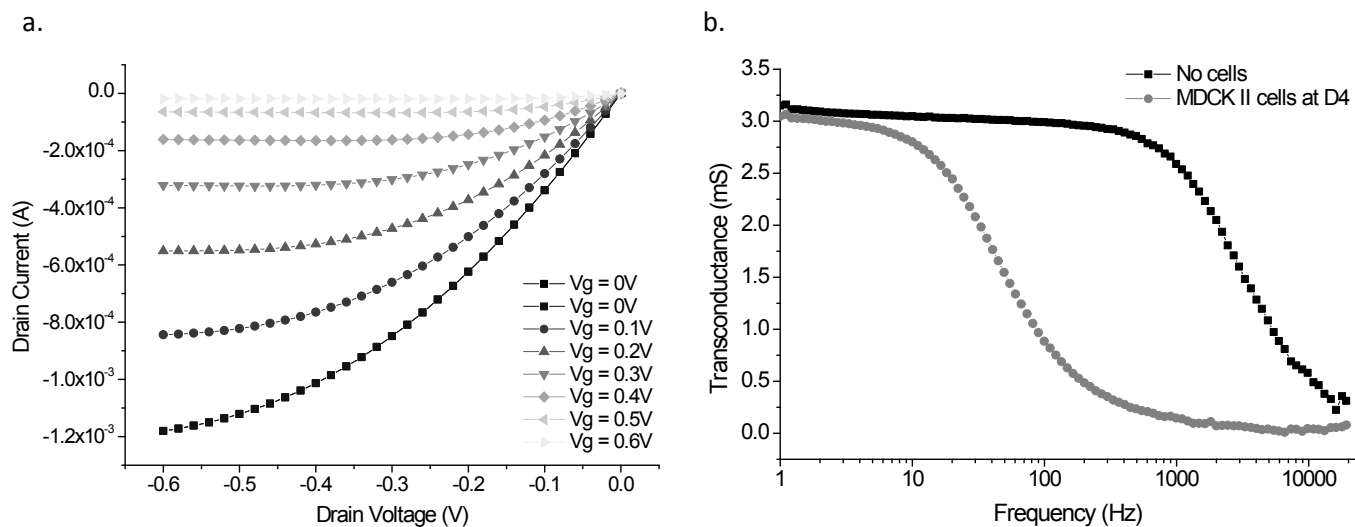

**Figure S2: Figures of merit of the OECT. a)  $I(V)$  characteristic of the OECT without cells. b) Transconductance versus the frequency with (grey) and without (black) MDCK II cells at day 4.**

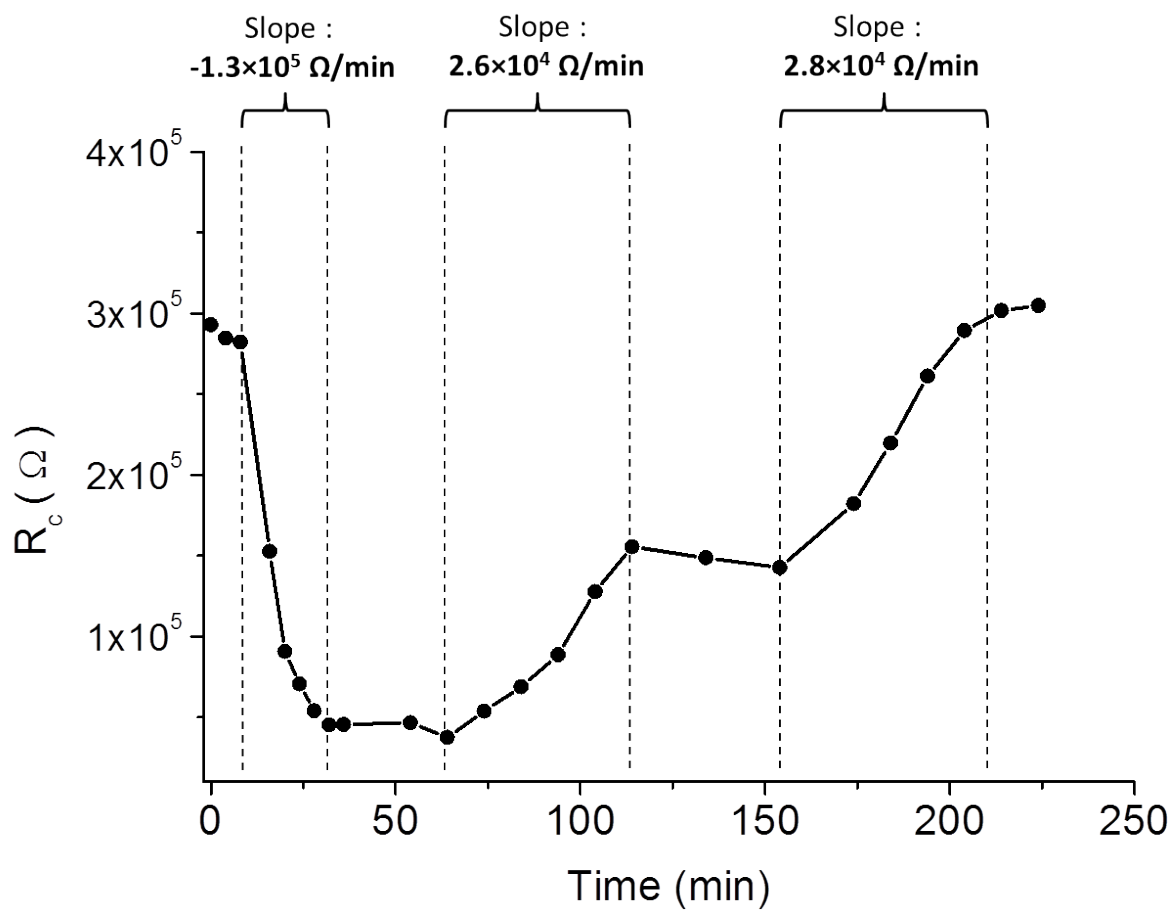

Figure S3: Calcium switch assay using OECTs (from Figure 3) with slopes indicated on the curve.

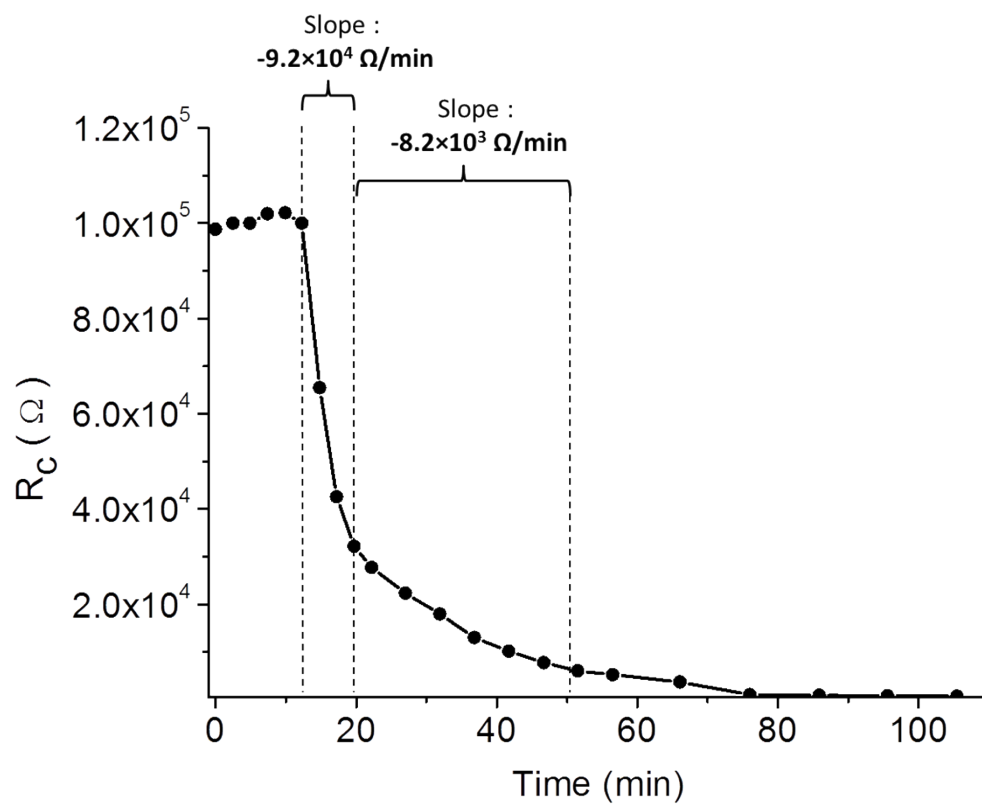

Figure S4: Addition of EGTA to MDCK II cells (figure 4 from manuscript) with slopes indicated on the curve.
